# Supplementary material
Source: MDPI journal article supplement (https://www.mdpi.com/2073-4395/11/6/1207)
Supplement: s1 [file s1]

Table S1. Accuracy metrics relative to NASA POWER maximum temperature with and without bias correction for all 14 locations.

|              |                          |                 |      | RMSE | NRMSE | MBE   | NMBE  |       |      |
|--------------|--------------------------|-----------------|------|------|-------|-------|-------|-------|------|
| Location     | Bias correction scheme   | b               | R2   | (°C) | (%)   | (°C)  | (%)   | EF    |      |
| Alentejo     | No Bias Correction       | 0.98            | 0.95 | 1.95 | 8.07  | -0.64 | -2.66 | 0.94  |      |
|              | Regional Bias Correction | Calibration Set | 1.00 | 0.95 | 1.78  | 7.36  | 0.02  | 0.10  | 0.95 |
|              |                          | Validation Set  | 1.00 | 0.95 | 1.78  | 7.38  | 0.03  | 0.14  | 0.95 |
|              |                          | Full Set        | 1.00 | 0.95 | 1.78  | 7.37  | 0.03  | 0.12  | 0.95 |
| Aljustrel    | No Bias Correction       | 0.96            | 0.96 | 1.92 | 7.82  | -1.01 | -4.11 | 0.93  |      |
|              | Regional Bias Correction | 0.99            | 0.96 | 1.61 | 6.59  | -0.34 | -1.37 | 0.95  |      |
|              | Local Bias Correction    | Calibration Set | 1.00 | 0.96 | 1.57  | 6.41  | 0.04  | 0.15  | 0.96 |
|              |                          | Validation Set  | 1.00 | 0.96 | 1.59  | 6.52  | 0.11  | 0.47  | 0.95 |
|              |                          | Full Set        | 1.00 | 0.96 | 1.58  | 6.46  | 0.08  | 0.31  | 0.95 |
| Alvalade     | No Bias Correction       | 0.96            | 0.95 | 2.15 | 8.69  | -1.27 | -5.12 | 0.91  |      |
|              | Regional Bias Correction | 0.98            | 0.95 | 1.77 | 7.14  | -0.60 | -2.41 | 0.94  |      |
|              | Local Bias Correction    | Calibration Set | 1.00 | 0.95 | 1.67  | 6.73  | 0.06  | 0.26  | 0.95 |
|              |                          | Validation Set  | 1.00 | 0.95 | 1.63  | 6.60  | 0.06  | 0.24  | 0.95 |
|              |                          | Full Set        | 1.00 | 0.95 | 1.65  | 6.66  | 0.06  | 0.25  | 0.95 |
| Beja         | No Bias Correction       | 1.00            | 0.96 | 1.64 | 6.83  | -0.11 | -0.46 | 0.96  |      |
|              | Regional Bias Correction | 1.02            | 0.96 | 1.63 | 6.78  | 0.54  | 2.27  | 0.96  |      |
|              | Local Bias Correction    | Calibration Set | 1.00 | 0.96 | 1.51  | 6.28  | 0.01  | 0.03  | 0.96 |
|              |                          | Validation Set  | 1.00 | 0.96 | 1.50  | 6.22  | 0.02  | 0.08  | 0.96 |
|              |                          | Full Set        | 1.00 | 0.96 | 1.50  | 6.25  | 0.01  | 0.06  | 0.96 |
| Castro Verde | No Bias Correction       | 0.97            | 0.97 | 1.52 | 6.28  | -0.67 | -2.77 | 0.96  |      |
|              | Regional Bias Correction | 0.99            | 0.97 | 1.38 | 5.70  | 0.00  | -0.01 | 0.97  |      |
|              | Local Bias Correction    | Calibration Set | 1.00 | 0.97 | 1.37  | 5.66  | 0.00  | 0.00  | 0.97 |
|              |                          | Validation Set  | 1.00 | 0.97 | 1.37  | 5.63  | -0.02 | -0.07 | 0.97 |
|              |                          | Full Set        | 1.00 | 0.97 | 1.37  | 5.64  | -0.01 | -0.04 | 0.97 |
| Elvas        | No Bias Correction       | 0.95            | 0.96 | 2.23 | 9.08  | -1.40 | -5.71 | 0.93  |      |
|              | Regional Bias Correction | 0.97            | 0.96 | 1.82 | 7.41  | -0.72 | -2.93 | 0.95  |      |
|              | Local Bias Correction    | Calibration Set | 1.00 | 0.96 | 1.68  | 6.81  | 0.05  | 0.22  | 0.96 |
|              |                          | Validation Set  | 1.00 | 0.96 | 1.66  | 6.79  | 0.04  | 0.16  | 0.96 |
|              |                          | Full Set        | 1.00 | 0.96 | 1.67  | 6.80  | 0.05  | 0.19  | 0.96 |
| Estremoz     | No Bias Correction       | 1.02            | 0.96 | 1.81 | 7.95  | 0.56  | 2.43  | 0.95  |      |
|              | Regional Bias Correction | 1.04            | 0.96 | 2.08 | 9.10  | 1.23  | 5.39  | 0.93  |      |
|              | Local Bias Correction    | Calibration Set | 1.00 | 0.97 | 1.47  | 6.53  | -0.03 | -0.11 | 0.97 |
|              |                          | Validation Set  | 1.00 | 0.97 | 1.39  | 6.17  | -0.02 | -0.08 | 0.97 |
|              |                          | Full Set        | 0.98 | 0.96 | 1.74  | 7.61  | -0.42 | -1.85 | 0.95 |
| Évora        | No Bias Correction       | 0.98            | 0.96 | 1.84 | 7.75  | -0.59 | -2.50 | 0.95  |      |
|              | Regional Bias Correction | 1.00            | 0.96 | 1.66 | 7.00  | 0.09  | 0.39  | 0.96  |      |
|              | Local Bias Correction    | Calibration Set | 1.00 | 0.96 | 1.62  | 6.78  | 0.03  | 0.12  | 0.96 |
|              |                          | Validation Set  | 1.00 | 0.96 | 1.64  | 6.88  | -0.01 | -0.03 | 0.96 |
|              |                          | Full Set        | 1.00 | 0.96 | 1.64  | 6.91  | -0.03 | -0.11 | 0.96 |

|                      |                          |                 |      |      |      |       |       |       |      |
|----------------------|--------------------------|-----------------|------|------|------|-------|-------|-------|------|
| Ferreira do Alentejo | No Bias Correction       |                 | 0.96 | 0.96 | 1.99 | 8.01  | -1.21 | -4.89 | 0.93 |
|                      | Regional Bias Correction |                 | 0.98 | 0.96 | 1.59 | 6.42  | -0.55 | -2.21 | 0.95 |
|                      | Local Bias Correction    | Calibration Set | 1.00 | 0.96 | 1.45 | 5.82  | 0.06  | 0.23  | 0.96 |
|                      |                          | Validation Set  | 1.00 | 0.96 | 1.52 | 6.13  | 0.01  | 0.05  | 0.96 |
|                      |                          | Full Set        | 1.00 | 0.96 | 1.48 | 5.98  | 0.04  | 0.14  | 0.96 |
| Moura                | No Bias Correction       |                 | 0.96 | 0.97 | 1.99 | 7.94  | -1.23 | -4.92 | 0.94 |
|                      | Regional Bias Correction |                 | 0.98 | 0.97 | 1.58 | 6.33  | -0.57 | -2.29 | 0.96 |
|                      | Local Bias Correction    | Calibration Set | 1.00 | 0.97 | 1.47 | 5.84  | 0.06  | 0.25  | 0.97 |
|                      |                          | Validation Set  | 1.00 | 0.97 | 1.46 | 5.87  | 0.08  | 0.32  | 0.97 |
|                      |                          | Full Set        | 1.00 | 0.97 | 1.46 | 5.85  | 0.07  | 0.28  | 0.97 |
| Odemira              | No Bias Correction       |                 | 1.03 | 0.82 | 2.67 | 12.55 | 0.57  | 2.68  | 0.68 |
|                      | Regional Bias Correction |                 | 1.06 | 0.82 | 2.80 | 13.12 | 1.30  | 6.12  | 0.65 |
|                      | Local Bias Correction    | Calibration Set | 0.99 | 0.83 | 2.04 | 9.58  | -0.11 | -0.50 | 0.82 |
|                      |                          | Validation Set  | 0.99 | 0.82 | 2.05 | 9.60  | -0.01 | -0.06 | 0.81 |
|                      |                          | Full Set        | 0.99 | 0.82 | 2.04 | 9.59  | -0.06 | -0.28 | 0.81 |
| Redondo              | No Bias Correction       |                 | 0.97 | 0.97 | 1.75 | 7.24  | -0.95 | -3.92 | 0.95 |
|                      | Regional Bias Correction |                 | 0.99 | 0.97 | 1.46 | 6.04  | -0.27 | -1.11 | 0.97 |
|                      | Local Bias Correction    | Calibration Set | 1.00 | 0.97 | 1.44 | 5.97  | 0.02  | 0.10  | 0.97 |
|                      |                          | Validation Set  | 1.00 | 0.97 | 1.44 | 5.94  | -0.01 | -0.06 | 0.97 |
|                      |                          | Full Set        | 1.00 | 0.97 | 1.44 | 5.95  | 0.01  | 0.02  | 0.97 |
| Serpa                | No Bias Correction       |                 | 0.97 | 0.95 | 2.01 | 7.99  | -0.79 | -3.14 | 0.94 |
|                      | Regional Bias Correction |                 | 0.99 | 0.95 | 1.80 | 7.14  | -0.16 | -0.62 | 0.95 |
|                      | Local Bias Correction    | Calibration Set | 1.00 | 0.95 | 1.73 | 7.00  | 0.03  | 0.13  | 0.95 |
|                      |                          | Validation Set  | 0.99 | 0.95 | 1.84 | 7.18  | -0.10 | -0.39 | 0.95 |
|                      |                          | Full Set        | 1.00 | 0.95 | 1.79 | 7.10  | -0.03 | -0.14 | 0.95 |
| Viana do Alentejo    | No Bias Correction       |                 | 1.00 | 0.97 | 1.36 | 5.73  | 0.14  | 0.60  | 0.97 |
|                      | Regional Bias Correction |                 | 1.02 | 0.97 | 1.58 | 6.66  | 0.80  | 3.36  | 0.96 |
|                      | Local Bias Correction    | Calibration Set | 1.00 | 0.97 | 1.34 | 5.62  | 0.00  | 0.00  | 0.97 |
|                      |                          | Validation Set  | 1.00 | 0.97 | 1.38 | 5.81  | 0.00  | 0.01  | 0.97 |
|                      |                          | Full Set        | 1.00 | 0.97 | 1.36 | 5.72  | 0.00  | 0.01  | 0.97 |
| Vidigueira           | No Bias Correction       |                 | 0.97 | 0.97 | 1.86 | 7.44  | -1.02 | -4.05 | 0.94 |
|                      | Regional Bias Correction |                 | 0.99 | 0.97 | 1.53 | 6.10  | -0.37 | -1.46 | 0.96 |
|                      | Local Bias Correction    | Calibration Set | 1.00 | 0.97 | 1.45 | 5.78  | 0.05  | 0.18  | 0.97 |
|                      |                          | Validation Set  | 1.00 | 0.96 | 1.50 | 5.97  | -0.01 | -0.04 | 0.96 |
|                      |                          | Full Set        | 1.00 | 0.97 | 1.47 | 5.88  | 0.02  | 0.07  | 0.97 |

Table S2. Accuracy metrics relative to NASA POWER minimum temperature with and without bias correction for all 14 locations.

|                      |                          |                          |      | RMSE | NRMSE | MBE   | NMBE  |       |      |
|----------------------|--------------------------|--------------------------|------|------|-------|-------|-------|-------|------|
| Location             | Bias correction scheme   |                          | b    | R2   | (°C)  | (%)   | (°C)  | (%)   | EF   |
| Alentejo             | Regional Bias Correction | No Bias Correction       | 1.08 | 0.89 | 2.06  | 20.74 | 1.03  | 10.38 | 0.84 |
|                      |                          | Calibration Set          | 0.98 | 0.89 | 1.73  | 17.45 | -0.05 | -0.50 | 0.89 |
|                      |                          | Validation Set           | 0.98 | 0.89 | 1.71  | 17.22 | -0.07 | -0.67 | 0.89 |
|                      |                          | Full Set                 | 0.98 | 0.89 | 1.72  | 17.34 | -0.06 | -0.58 | 0.89 |
| Aljustrel            | Regional Bias Correction | No Bias Correction       | 1.09 | 0.91 | 1.97  | 19.84 | 1.26  | 12.71 | 0.85 |
|                      |                          | Regional Bias Correction | 0.99 | 0.91 | 1.51  | 15.21 | 0.16  | 1.64  | 0.91 |
|                      | Local Bias Correction    | Calibration Set          | 0.99 | 0.91 | 1.53  | 15.56 | 0.01  | 0.07  | 0.91 |
|                      |                          | Validation Set           | 0.99 | 0.92 | 1.50  | 14.99 | -0.06 | -0.61 | 0.91 |
|                      |                          | Full Set                 | 0.99 | 0.91 | 1.52  | 15.27 | -0.03 | -0.27 | 0.91 |
| Alvalade             | Regional Bias Correction | No Bias Correction       | 1.06 | 0.90 | 1.83  | 17.74 | 0.87  | 8.44  | 0.87 |
|                      |                          | Regional Bias Correction | 0.96 | 0.90 | 1.60  | 15.52 | -0.23 | -2.20 | 0.90 |
|                      | Local Bias Correction    | Calibration Set          | 0.99 | 0.90 | 1.61  | 15.44 | -0.01 | -0.08 | 0.90 |
|                      |                          | Validation Set           | 0.99 | 0.90 | 1.60  | 15.61 | 0.01  | 0.12  | 0.90 |
|                      |                          | Full Set                 | 0.99 | 0.90 | 1.60  | 15.52 | 0.00  | 0.02  | 0.90 |
| Beja                 | Regional Bias Correction | No Bias Correction       | 1.05 | 0.93 | 1.65  | 15.81 | 0.40  | 3.85  | 0.88 |
|                      |                          | Regional Bias Correction | 0.96 | 0.93 | 1.60  | 15.40 | -0.68 | -6.54 | 0.89 |
|                      | Local Bias Correction    | Calibration Set          | 0.99 | 0.93 | 1.27  | 12.28 | -0.05 | -0.48 | 0.93 |
|                      |                          | Validation Set           | 1.00 | 0.93 | 1.30  | 12.44 | 0.02  | 0.15  | 0.93 |
|                      |                          | Full Set                 | 0.99 | 0.93 | 1.29  | 12.36 | -0.02 | -0.16 | 0.93 |
| Castro Verde         | Regional Bias Correction | No Bias Correction       | 1.10 | 0.93 | 1.82  | 18.34 | 1.27  | 12.78 | 0.86 |
|                      |                          | Regional Bias Correction | 1.00 | 0.93 | 1.28  | 12.93 | 0.17  | 1.70  | 0.93 |
|                      | Local Bias Correction    | Calibration Set          | 0.99 | 0.93 | 1.29  | 13.02 | -0.02 | -0.24 | 0.93 |
|                      |                          | Validation Set           | 1.00 | 0.93 | 1.29  | 12.90 | 0.01  | 0.11  | 0.93 |
|                      |                          | Full Set                 | 0.99 | 0.93 | 1.29  | 12.97 | -0.01 | -0.06 | 0.93 |
| Elvas                | Regional Bias Correction | No Bias Correction       | 1.06 | 0.91 | 1.93  | 20.33 | 0.78  | 8.16  | 0.88 |
|                      |                          | Regional Bias Correction | 0.97 | 0.91 | 1.72  | 18.12 | -0.28 | -2.95 | 0.91 |
|                      | Local Bias Correction    | Calibration Set          | 0.99 | 0.91 | 1.71  | 17.81 | -0.04 | -0.44 | 0.91 |
|                      |                          | Validation Set           | 0.98 | 0.91 | 1.68  | 17.85 | -0.06 | -0.63 | 0.91 |
|                      |                          | Full Set                 | 0.98 | 0.91 | 1.70  | 17.83 | -0.05 | -0.54 | 0.91 |
| Estremoz             | Regional Bias Correction | No Bias Correction       | 1.10 | 0.91 | 2.02  | 21.74 | 1.05  | 11.32 | 0.84 |
|                      |                          | Regional Bias Correction | 1.00 | 0.91 | 1.62  | 17.40 | -0.01 | -0.06 | 0.90 |
|                      | Local Bias Correction    | Calibration Set          | 0.98 | 0.91 | 1.48  | 15.64 | -0.12 | -1.21 | 0.91 |
|                      |                          | Validation Set           | 0.98 | 0.91 | 1.48  | 15.77 | -0.16 | -1.68 | 0.91 |
|                      |                          | Full Set                 | 0.98 | 0.91 | 1.54  | 16.52 | -0.06 | -0.66 | 0.91 |
| Évora                | Regional Bias Correction | No Bias Correction       | 1.11 | 0.89 | 2.30  | 25.35 | 1.31  | 14.51 | 0.81 |
|                      |                          | Regional Bias Correction | 1.01 | 0.89 | 1.82  | 20.12 | 0.25  | 2.81  | 0.88 |
|                      | Local Bias Correction    | Calibration Set          | 0.98 | 0.89 | 1.78  | 19.66 | -0.09 | -1.00 | 0.89 |
|                      |                          | Validation Set           | 0.98 | 0.89 | 1.77  | 19.79 | -0.04 | -0.48 | 0.89 |
|                      |                          | Full Set                 | 0.98 | 0.89 | 1.78  | 19.65 | -0.05 | -0.55 | 0.89 |
| Ferreira do Alentejo | Regional Bias Correction | No Bias Correction       | 1.08 | 0.89 | 2.06  | 20.94 | 1.15  | 11.69 | 0.84 |
|                      |                          | Regional Bias Correction | 0.98 | 0.89 | 1.70  | 17.27 | 0.06  | 0.61  | 0.89 |
|                      |                          | Calibration Set          | 0.99 | 0.90 | 1.71  | 17.34 | 0.02  | 0.19  | 0.89 |

|                      |                          |                 |      |      |      |       |       |        |      |
|----------------------|--------------------------|-----------------|------|------|------|-------|-------|--------|------|
|                      | Local Bias<br>Correction | Validation Set  | 0.99 | 0.89 | 1.73 | 17.65 | 0.02  | 0.24   | 0.89 |
|                      |                          | Full Set        | 0.99 | 0.89 | 1.72 | 17.49 | 0.02  | 0.21   | 0.89 |
| Moura                | No Bias Correction       |                 | 1.15 | 0.86 | 3.17 | 37.05 | 2.24  | 26.22  | 0.72 |
|                      | Regional Bias Correction |                 | 1.05 | 0.86 | 2.50 | 29.20 | 1.16  | 13.59  | 0.83 |
|                      | Local Bias<br>Correction | Calibration Set | 0.98 | 0.88 | 2.18 | 26.43 | 0.03  | 0.39   | 0.87 |
|                      |                          | Validation Set  | 0.98 | 0.85 | 2.32 | 26.38 | 0.00  | 0.05   | 0.84 |
|                      |                          | Full Set        | 0.98 | 0.86 | 2.25 | 26.35 | 0.02  | 0.22   | 0.86 |
| Odemira              | No Bias Correction       |                 | 1.13 | 0.85 | 2.33 | 20.99 | 1.64  | 14.72  | 0.65 |
|                      | Regional Bias Correction |                 | 1.03 | 0.85 | 1.66 | 14.92 | 0.46  | 4.16   | 0.82 |
|                      | Local Bias<br>Correction | Calibration Set | 0.98 | 0.85 | 1.58 | 14.20 | -0.13 | -1.13  | 0.84 |
|                      |                          | Validation Set  | 0.98 | 0.85 | 1.56 | 14.03 | -0.17 | -1.54  | 0.84 |
|                      |                          | Full Set        | 0.98 | 0.85 | 1.57 | 14.12 | -0.15 | -1.33  | 0.84 |
| Redondo              | No Bias Correction       |                 | 0.99 | 0.92 | 1.57 | 14.98 | -0.15 | -1.41  | 0.91 |
|                      | Regional Bias Correction |                 | 0.90 | 0.92 | 1.91 | 18.26 | -1.20 | -11.52 | 0.87 |
|                      | Local Bias<br>Correction | Calibration Set | 0.99 | 0.92 | 1.47 | 14.16 | 0.01  | 0.09   | 0.92 |
|                      |                          | Validation Set  | 1.00 | 0.92 | 1.47 | 13.96 | 0.04  | 0.37   | 0.92 |
|                      |                          | Full Set        | 1.00 | 0.92 | 1.47 | 14.06 | 0.02  | 0.23   | 0.92 |
| Serpa                | No Bias Correction       |                 | 1.07 | 0.93 | 1.68 | 16.10 | 0.72  | 6.87   | 0.89 |
|                      | Regional Bias Correction |                 | 0.97 | 0.93 | 1.48 | 14.13 | -0.38 | -3.63  | 0.92 |
|                      | Local Bias<br>Correction | Calibration Set | 0.99 | 0.94 | 1.29 | 12.46 | -0.06 | -0.54  | 0.94 |
|                      |                          | Validation Set  | 1.00 | 0.92 | 1.46 | 13.86 | 0.12  | 1.13   | 0.92 |
|                      |                          | Full Set        | 0.99 | 0.93 | 1.38 | 13.19 | 0.03  | 0.30   | 0.93 |
| Viana do<br>Alentejo | No Bias Correction       |                 | 1.10 | 0.92 | 1.83 | 18.30 | 1.17  | 11.74  | 0.85 |
|                      | Regional Bias Correction |                 | 1.00 | 0.92 | 1.33 | 13.31 | 0.07  | 0.74   | 0.92 |
|                      | Local Bias<br>Correction | Calibration Set | 0.99 | 0.93 | 1.26 | 13.01 | -0.09 | -0.90  | 0.93 |
|                      |                          | Validation Set  | 0.99 | 0.92 | 1.34 | 13.08 | -0.07 | -0.69  | 0.92 |
|                      |                          | Full Set        | 0.99 | 0.92 | 1.30 | 13.05 | -0.08 | -0.79  | 0.92 |
| Vidigueira           | No Bias Correction       |                 | 1.06 | 0.89 | 1.98 | 19.61 | 0.76  | 7.54   | 0.85 |
|                      | Regional Bias Correction |                 | 0.97 | 0.89 | 1.78 | 17.67 | -0.32 | -3.21  | 0.88 |
|                      | Local Bias<br>Correction | Calibration Set | 0.98 | 0.89 | 1.73 | 17.79 | -0.04 | -0.38  | 0.89 |
|                      |                          | Validation Set  | 1.00 | 0.89 | 1.75 | 16.77 | 0.19  | 1.82   | 0.88 |
|                      |                          | Full Set        | 0.99 | 0.89 | 1.74 | 17.26 | 0.08  | 0.76   | 0.89 |

Table S3. Accuracy metrics relative to NASA POWER solar radiation with and without bias correction for all 14 locations.

| Location             | Bias correction scheme     | b    | R2   | RMSE<br>(MJ m <sup>-2</sup> d <sup>-1</sup> ) | NRMSE<br>(%) | MBE<br>(MJ m <sup>-2</sup> d <sup>-1</sup> ) | NMBE<br>(%) | EF   |
|----------------------|----------------------------|------|------|-----------------------------------------------|--------------|----------------------------------------------|-------------|------|
| Alentejo             | No Bias Correction         | 1.03 | 0.94 | 2.14                                          | 12.63        | 0.65                                         | 3.83        | 0.93 |
|                      | Regional Calibration Set   | 0.99 | 0.94 | 2.04                                          | 12.02        | -0.01                                        | -0.05       | 0.94 |
|                      | Bias Validation Set        | 0.99 | 0.94 | 2.01                                          | 11.88        | 0.00                                         | -0.03       | 0.94 |
|                      | Correction Full Set        | 0.99 | 0.94 | 2.02                                          | 11.95        | -0.01                                        | -0.04       | 0.94 |
| Aljustrel            | No Bias Correction         | 1.08 | 0.94 | 2.59                                          | 15.75        | 1.62                                         | 9.86        | 0.89 |
|                      | Regional Bias Correction   | 1.05 | 0.94 | 2.21                                          | 13.47        | 0.96                                         | 5.84        | 0.92 |
|                      | Local Bias Calibration Set | 0.99 | 0.93 | 1.99                                          | 12.04        | -0.06                                        | -0.34       | 0.93 |
|                      | Correction Validation Set  | 0.99 | 0.94 | 1.94                                          | 11.87        | -0.08                                        | -0.48       | 0.94 |
|                      | Full Set                   | 0.99 | 0.94 | 1.96                                          | 11.95        | -0.07                                        | -0.41       | 0.94 |
| Alvalade             | No Bias Correction         | 1.04 | 0.91 | 2.73                                          | 16.12        | 1.12                                         | 6.63        | 0.89 |
|                      | Regional Bias Correction   | 1.01 | 0.91 | 2.52                                          | 14.87        | 0.46                                         | 2.73        | 0.90 |
|                      | Local Bias Calibration Set | 0.99 | 0.91 | 2.44                                          | 14.32        | 0.01                                         | 0.05        | 0.91 |
|                      | Correction Validation Set  | 0.99 | 0.90 | 2.55                                          | 15.15        | -0.02                                        | -0.13       | 0.90 |
|                      | Full Set                   | 0.99 | 0.91 | 2.50                                          | 14.73        | -0.01                                        | -0.04       | 0.90 |
| Beja                 | No Bias Correction         | 0.95 | 0.94 | 2.20                                          | 12.14        | -0.84                                        | -4.65       | 0.93 |
|                      | Regional Bias Correction   | 0.92 | 0.94 | 2.53                                          | 13.94        | -1.49                                        | -8.24       | 0.91 |
|                      | Local Bias Calibration Set | 0.99 | 0.94 | 2.05                                          | 11.30        | -0.04                                        | -0.20       | 0.94 |
|                      | Correction Validation Set  | 1.00 | 0.94 | 2.05                                          | 11.31        | -0.02                                        | -0.10       | 0.94 |
|                      | Full Set                   | 0.99 | 0.94 | 2.05                                          | 11.31        | -0.03                                        | -0.15       | 0.94 |
| Castro Verde         | No Bias Correction         | 1.01 | 0.94 | 1.98                                          | 11.27        | 0.40                                         | 2.26        | 0.94 |
|                      | Regional Bias Correction   | 0.98 | 0.94 | 1.95                                          | 11.14        | -0.26                                        | -1.50       | 0.94 |
|                      | Local Bias Calibration Set | 1.00 | 0.94 | 1.94                                          | 10.88        | 0.01                                         | 0.04        | 0.94 |
|                      | Correction Validation Set  | 1.00 | 0.94 | 1.96                                          | 11.40        | 0.18                                         | 1.05        | 0.94 |
|                      | Full Set                   | 1.00 | 0.94 | 1.95                                          | 11.13        | 0.09                                         | 0.54        | 0.94 |
| Elvas                | No Bias Correction         | 1.02 | 0.94 | 2.00                                          | 11.84        | 0.39                                         | 2.31        | 0.94 |
|                      | Regional Bias Correction   | 0.98 | 0.94 | 1.96                                          | 11.63        | -0.26                                        | -1.54       | 0.94 |
|                      | Local Bias Calibration Set | 0.99 | 0.94 | 1.98                                          | 11.68        | -0.01                                        | -0.04       | 0.94 |
|                      | Correction Validation Set  | 0.99 | 0.95 | 1.91                                          | 11.33        | -0.08                                        | -0.47       | 0.94 |
|                      | Full Set                   | 0.99 | 0.94 | 1.95                                          | 11.51        | -0.04                                        | -0.25       | 0.94 |
| Estremoz             | No Bias Correction         | 1.03 | 0.96 | 1.89                                          | 11.34        | 0.79                                         | 4.72        | 0.95 |
|                      | Regional Bias Correction   | 1.00 | 0.96 | 1.72                                          | 10.32        | 0.13                                         | 0.80        | 0.96 |
|                      | Local Bias Calibration Set | 1.00 | 0.96 | 1.67                                          | 9.84         | 0.02                                         | 0.13        | 0.96 |
|                      | Correction Validation Set  | 1.00 | 0.96 | 1.67                                          | 10.00        | 0.02                                         | 0.11        | 0.96 |
|                      | Full Set                   | 1.01 | 0.96 | 1.76                                          | 10.55        | 0.13                                         | 0.81        | 0.95 |
| Évora                | No Bias Correction         | 1.08 | 0.96 | 2.14                                          | 13.27        | 1.33                                         | 8.26        | 0.92 |
|                      | Regional Bias Correction   | 1.04 | 0.96 | 1.77                                          | 10.98        | 0.68                                         | 4.20        | 0.95 |
|                      | Local Bias Calibration Set | 0.99 | 0.96 | 1.52                                          | 9.67         | -0.09                                        | -0.56       | 0.96 |
|                      | Correction Validation Set  | 0.99 | 0.96 | 1.48                                          | 9.11         | -0.10                                        | -0.59       | 0.96 |
|                      | Full Set                   | 0.99 | 0.96 | 1.53                                          | 9.50         | -0.11                                        | -0.68       | 0.96 |
| Ferreira do Alentejo | No Bias Correction         | 1.03 | 0.93 | 2.18                                          | 13.07        | 0.64                                         | 3.80        | 0.92 |
|                      | Regional Bias Correction   | 1.00 | 0.93 | 2.06                                          | 12.35        | -0.02                                        | -0.10       | 0.93 |
|                      | Calibration Set            | 0.99 | 0.94 | 1.99                                          | 11.90        | -0.02                                        | -0.14       | 0.93 |

|                   |                          |                 |      |      |      |       |       |       |      |
|-------------------|--------------------------|-----------------|------|------|------|-------|-------|-------|------|
|                   | Local Bias Correction    | Validation Set  | 1.00 | 0.93 | 2.06 | 12.31 | 0.01  | 0.04  | 0.93 |
|                   |                          | Full Set        | 0.99 | 0.93 | 2.02 | 12.10 | -0.01 | -0.05 | 0.93 |
| Moura             | No Bias Correction       |                 | 1.05 | 0.94 | 2.20 | 13.37 | 0.87  | 5.28  | 0.92 |
|                   | Regional Bias Correction |                 | 1.01 | 0.94 | 1.99 | 12.14 | 0.22  | 1.32  | 0.93 |
|                   | Local Bias Correction    | Calibration Set | 0.99 | 0.94 | 1.89 | 11.55 | -0.05 | -0.32 | 0.94 |
|                   |                          | Validation Set  | 1.00 | 0.94 | 1.89 | 11.45 | 0.00  | 0.02  | 0.94 |
|                   |                          | Full Set        | 0.99 | 0.94 | 1.89 | 11.49 | -0.02 | -0.15 | 0.94 |
| Odemira           | No Bias Correction       |                 | 1.00 | 0.94 | 2.00 | 11.14 | 0.12  | 0.66  | 0.94 |
|                   | Regional Bias Correction |                 | 0.97 | 0.94 | 2.06 | 11.48 | -0.54 | -3.03 | 0.93 |
|                   | Local Bias Correction    | Calibration Set | 0.99 | 0.94 | 1.97 | 11.15 | 0.00  | 0.00  | 0.94 |
|                   |                          | Validation Set  | 0.99 | 0.94 | 2.01 | 11.07 | -0.04 | -0.25 | 0.94 |
|                   |                          | Full Set        | 0.99 | 0.94 | 1.99 | 11.11 | -0.02 | -0.13 | 0.94 |
| Redondo           | No Bias Correction       |                 | 1.04 | 0.97 | 1.67 | 10.12 | 0.73  | 4.43  | 0.95 |
|                   | Regional Bias Correction |                 | 1.01 | 0.97 | 1.48 | 8.92  | 0.08  | 0.49  | 0.96 |
|                   | Local Bias Correction    | Calibration Set | 1.00 | 0.97 | 1.40 | 8.49  | -0.03 | -0.19 | 0.97 |
|                   |                          | Validation Set  | 1.00 | 0.97 | 1.45 | 8.74  | -0.02 | -0.09 | 0.97 |
|                   |                          | Full Set        | 1.00 | 0.97 | 1.43 | 8.62  | -0.02 | -0.14 | 0.97 |
| Serpa             | No Bias Correction       |                 | 1.05 | 0.95 | 2.07 | 12.31 | 1.12  | 6.68  | 0.93 |
|                   | Regional Bias Correction |                 | 1.01 | 0.95 | 1.80 | 10.70 | 0.46  | 2.76  | 0.95 |
|                   | Local Bias Correction    | Calibration Set | 1.00 | 0.96 | 1.64 | 9.80  | 0.03  | 0.18  | 0.96 |
|                   |                          | Validation Set  | 1.01 | 0.95 | 1.89 | 11.19 | 0.30  | 1.76  | 0.94 |
|                   |                          | Full Set        | 1.01 | 0.95 | 1.77 | 10.53 | 0.16  | 0.97  | 0.95 |
| Viana do Alentejo | No Bias Correction       |                 | 1.03 | 0.93 | 2.29 | 13.60 | 0.69  | 4.10  | 0.91 |
|                   | Regional Bias Correction |                 | 1.00 | 0.93 | 2.17 | 12.86 | 0.04  | 0.22  | 0.92 |
|                   | Local Bias Correction    | Calibration Set | 0.99 | 0.93 | 2.12 | 12.52 | -0.02 | -0.11 | 0.93 |
|                   |                          | Validation Set  | 0.99 | 0.92 | 2.18 | 12.97 | 0.07  | 0.40  | 0.92 |
|                   |                          | Full Set        | 0.99 | 0.93 | 2.15 | 12.75 | 0.03  | 0.15  | 0.92 |
| Vidigueira        | No Bias Correction       |                 | 1.00 | 0.97 | 1.51 | 8.75  | 0.11  | 0.64  | 0.97 |
|                   | Regional Bias Correction |                 | 0.97 | 0.97 | 1.61 | 9.30  | -0.54 | -3.14 | 0.96 |
|                   | Local Bias Correction    | Calibration Set | 1.00 | 0.97 | 1.48 | 8.55  | 0.00  | 0.01  | 0.97 |
|                   |                          | Validation Set  | 1.00 | 0.97 | 1.55 | 8.98  | 0.09  | 0.50  | 0.97 |
|                   |                          | Full Set        | 1.00 | 0.97 | 1.52 | 8.77  | 0.04  | 0.25  | 0.97 |

Table S4. Accuracy metrics relative to NASA POWER relative humidity with and without bias correction for all 14 locations.

|                      |                          |                    |      | RMSE | NRMSE | MBE   | NMBE  |       |      |
|----------------------|--------------------------|--------------------|------|------|-------|-------|-------|-------|------|
| Location             | Bias correction scheme   |                    | b    | R2   | (%)   | (%)   | (%)   | (%)   | EF   |
| Alentejo             | Regional Bias Correction | No Bias Correction | 0.93 | 0.83 | 9.27  | 13.05 | -5.12 | -7.21 | 0.66 |
|                      |                          | Calibration Set    | 1.01 | 0.83 | 6.67  | 9.38  | 0.79  | 1.11  | 0.82 |
|                      |                          | Validation Set     | 1.01 | 0.83 | 6.66  | 9.37  | 0.77  | 1.08  | 0.82 |
|                      |                          | Full Set           | 1.01 | 0.83 | 6.66  | 9.38  | 0.78  | 1.09  | 0.82 |
| Aljustrel            | Regional Bias Correction | No Bias Correction | 0.94 | 0.83 | 8.96  | 12.38 | -5.02 | -6.94 | 0.63 |
|                      |                          | Full Set           | 1.01 | 0.83 | 6.26  | 8.66  | 0.67  | 0.92  | 0.82 |
|                      | Local Bias Correction    | Calibration Set    | 1.01 | 0.83 | 6.16  | 8.50  | 0.89  | 1.23  | 0.82 |
|                      |                          | Validation Set     | 1.01 | 0.83 | 6.24  | 8.64  | 0.96  | 1.33  | 0.83 |
|                      |                          | Full Set           | 1.01 | 0.83 | 6.20  | 8.57  | 0.92  | 1.28  | 0.82 |
| Alvalade             | Regional Bias Correction | No Bias Correction | 0.93 | 0.85 | 9.58  | 13.10 | -5.76 | -7.89 | 0.48 |
|                      |                          | Full Set           | 1.00 | 0.85 | 5.91  | 8.09  | -0.07 | -0.10 | 0.80 |
|                      | Local Bias Correction    | Calibration Set    | 1.02 | 0.85 | 5.51  | 7.55  | 1.52  | 2.08  | 0.83 |
|                      |                          | Validation Set     | 1.02 | 0.85 | 5.38  | 7.35  | 1.51  | 2.06  | 0.83 |
|                      |                          | Full Set           | 1.02 | 0.85 | 5.44  | 7.45  | 1.51  | 2.07  | 0.83 |
| Beja                 | Regional Bias Correction | No Bias Correction | 0.93 | 0.85 | 9.58  | 13.64 | -5.59 | -7.96 | 0.63 |
|                      |                          | Full Set           | 1.00 | 0.85 | 6.44  | 9.17  | 0.52  | 0.74  | 0.83 |
|                      | Local Bias Correction    | Calibration Set    | 1.01 | 0.86 | 6.21  | 8.81  | 0.99  | 1.40  | 0.85 |
|                      |                          | Validation Set     | 1.01 | 0.84 | 6.57  | 9.41  | 1.12  | 1.61  | 0.82 |
|                      |                          | Full Set           | 1.01 | 0.85 | 6.40  | 9.11  | 1.05  | 1.50  | 0.84 |
| Castro Verde         | Regional Bias Correction | No Bias Correction | 0.93 | 0.83 | 9.01  | 12.46 | -5.23 | -7.24 | 0.69 |
|                      |                          | Full Set           | 1.00 | 0.83 | 6.71  | 9.29  | 0.50  | 0.70  | 0.83 |
|                      | Local Bias Correction    | Calibration Set    | 1.00 | 0.82 | 6.91  | 9.57  | 0.46  | 0.63  | 0.81 |
|                      |                          | Validation Set     | 1.00 | 0.83 | 6.80  | 9.41  | 0.40  | 0.55  | 0.82 |
|                      |                          | Full Set           | 1.00 | 0.83 | 6.86  | 9.49  | 0.43  | 0.59  | 0.82 |
| Elvas                | Regional Bias Correction | No Bias Correction | 0.95 | 0.88 | 8.30  | 12.23 | -3.77 | -5.56 | 0.79 |
|                      |                          | Full Set           | 1.03 | 0.88 | 6.73  | 9.92  | 2.41  | 3.55  | 0.86 |
|                      | Local Bias Correction    | Calibration Set    | 1.00 | 0.88 | 6.45  | 9.54  | 0.49  | 0.73  | 0.87 |
|                      |                          | Validation Set     | 1.00 | 0.88 | 6.31  | 9.25  | 0.42  | 0.62  | 0.88 |
|                      |                          | Full Set           | 1.00 | 0.88 | 6.38  | 9.40  | 0.46  | 0.67  | 0.87 |
| Estremoz             | Regional Bias Correction | No Bias Correction | 0.93 | 0.80 | 10.13 | 14.34 | -5.43 | -7.68 | 0.64 |
|                      |                          | Full Set           | 1.00 | 0.80 | 7.61  | 10.77 | 0.58  | 0.83  | 0.80 |
|                      | Local Bias Correction    | Calibration Set    | 1.00 | 0.79 | 8.21  | 11.74 | 0.47  | 0.67  | 0.78 |
|                      |                          | Validation Set     | 1.00 | 0.79 | 8.13  | 11.54 | 0.12  | 0.17  | 0.78 |
|                      |                          | Full Set           | 1.00 | 0.80 | 7.85  | 11.12 | 0.09  | 0.13  | 0.78 |
| Évora                | Regional Bias Correction | No Bias Correction | 0.93 | 0.87 | 9.75  | 13.70 | -5.95 | -8.36 | 0.56 |
|                      |                          | Full Set           | 1.00 | 0.87 | 5.96  | 8.38  | 0.06  | 0.09  | 0.83 |
|                      | Local Bias Correction    | Calibration Set    | 1.02 | 0.86 | 5.69  | 8.02  | 1.41  | 1.99  | 0.85 |
|                      |                          | Validation Set     | 1.02 | 0.87 | 5.53  | 7.72  | 1.39  | 1.94  | 0.86 |
|                      |                          | Full Set           | 1.01 | 0.87 | 5.60  | 7.86  | 1.31  | 1.84  | 0.85 |
| Ferreira do Alentejo | Regional Bias Correction | No Bias Correction | 0.93 | 0.86 | 8.78  | 12.12 | -5.63 | -7.77 | 0.62 |
|                      |                          | Full Set           | 1.00 | 0.86 | 5.50  | 7.60  | 0.14  | 0.20  | 0.85 |
|                      |                          | Calibration Set    | 1.01 | 0.86 | 5.50  | 7.58  | 1.04  | 1.44  | 0.85 |

|                   |                          |                 |      |      |       |       |       |       |       |
|-------------------|--------------------------|-----------------|------|------|-------|-------|-------|-------|-------|
|                   | Local Bias Correction    | Validation Set  | 1.01 | 0.86 | 5.48  | 7.58  | 1.16  | 1.60  | 0.85  |
|                   |                          | Full Set        | 1.01 | 0.86 | 5.49  | 7.58  | 1.10  | 1.52  | 0.85  |
| Moura             | No Bias Correction       |                 | 0.92 | 0.88 | 9.52  | 13.78 | -6.23 | -9.02 | 0.71  |
|                   | Regional Bias Correction |                 | 1.00 | 0.88 | 6.13  | 8.86  | 0.14  | 0.21  | 0.88  |
|                   | Local Bias Correction    | Calibration Set | 1.01 | 0.88 | 6.26  | 9.03  | 0.86  | 1.25  | 0.88  |
|                   |                          | Validation Set  | 1.01 | 0.88 | 6.21  | 9.01  | 0.92  | 1.34  | 0.88  |
|                   |                          | Full Set        | 1.01 | 0.88 | 6.23  | 9.01  | 0.89  | 1.28  | 0.88  |
| Odemira           | No Bias Correction       |                 | 0.94 | 0.40 | 11.18 | 14.57 | -4.56 | -5.95 | -0.08 |
|                   | Regional Bias Correction |                 | 1.00 | 0.40 | 9.24  | 12.04 | 0.38  | 0.49  | 0.26  |
|                   | Local Bias Correction    | Calibration Set | 1.00 | 0.42 | 9.19  | 12.01 | 0.60  | 0.79  | 0.29  |
|                   |                          | Validation Set  | 0.99 | 0.38 | 9.41  | 12.23 | -0.01 | -0.01 | 0.22  |
|                   |                          | Full Set        | 1.00 | 0.40 | 9.30  | 12.12 | 0.30  | 0.38  | 0.25  |
| Redondo           | No Bias Correction       |                 | 0.96 | 0.86 | 7.81  | 11.41 | -2.93 | -4.28 | 0.79  |
|                   | Regional Bias Correction |                 | 1.04 | 0.86 | 7.01  | 10.25 | 3.04  | 4.45  | 0.83  |
|                   | Local Bias Correction    | Calibration Set | 1.00 | 0.86 | 6.34  | 9.28  | 0.41  | 0.61  | 0.86  |
|                   |                          | Validation Set  | 1.01 | 0.86 | 6.47  | 9.45  | 0.84  | 1.23  | 0.85  |
|                   |                          | Full Set        | 1.00 | 0.86 | 6.41  | 9.37  | 0.63  | 0.92  | 0.86  |
| Serpa             | No Bias Correction       |                 | 0.93 | 0.84 | 9.77  | 14.08 | -5.39 | -7.77 | 0.61  |
|                   | Regional Bias Correction |                 | 1.01 | 0.84 | 6.67  | 9.61  | 0.81  | 1.17  | 0.82  |
|                   | Local Bias Correction    | Calibration Set | 1.01 | 0.84 | 6.45  | 9.28  | 1.10  | 1.58  | 0.83  |
|                   |                          | Validation Set  | 1.01 | 0.84 | 6.48  | 9.36  | 1.25  | 1.81  | 0.83  |
|                   |                          | Full Set        | 1.01 | 0.84 | 6.47  | 9.32  | 1.18  | 1.70  | 0.83  |
| Viana do Alentejo | No Bias Correction       |                 | 0.92 | 0.88 | 8.48  | 11.74 | -6.03 | -8.35 | 0.72  |
|                   | Regional Bias Correction |                 | 0.99 | 0.88 | 5.55  | 7.69  | -0.17 | -0.24 | 0.88  |
|                   | Local Bias Correction    | Calibration Set | 1.00 | 0.88 | 5.64  | 7.79  | 0.42  | 0.59  | 0.88  |
|                   |                          | Validation Set  | 1.00 | 0.88 | 5.64  | 7.83  | 0.44  | 0.60  | 0.88  |
|                   |                          | Full Set        | 1.00 | 0.88 | 5.63  | 7.79  | 0.39  | 0.54  | 0.88  |
| Vidigueira        | No Bias Correction       |                 | 0.94 | 0.87 | 8.54  | 12.38 | -4.82 | -6.99 | 0.75  |
|                   | Regional Bias Correction |                 | 1.01 | 0.87 | 6.37  | 9.24  | 1.35  | 1.96  | 0.86  |
|                   | Local Bias Correction    | Calibration Set | 1.00 | 0.87 | 6.20  | 9.01  | 0.55  | 0.80  | 0.87  |
|                   |                          | Validation Set  | 1.00 | 0.86 | 6.51  | 9.42  | 0.66  | 0.96  | 0.85  |
|                   |                          | Full Set        | 1.00 | 0.87 | 6.36  | 9.22  | 0.60  | 0.88  | 0.86  |

Table S5. Accuracy metrics relative to NASA POWER wind speed with and without bias correction for all 14 locations.

| Location             | Bias correction scheme   |                 | b    | R2   | RMSE<br>(m s <sup>-1</sup> ) | NRMSE<br>(%) | MBE<br>(m s <sup>-1</sup> ) | NMBE<br>(%) | EF    |
|----------------------|--------------------------|-----------------|------|------|------------------------------|--------------|-----------------------------|-------------|-------|
| Alentejo             | No Bias Correction       |                 | 1.33 | 0.56 | 1.15                         | 60.61        | 0.87                        | 45.63       | -0.35 |
|                      | Regional Bias Correction | Calibration Set | 0.90 | 0.56 | 0.71                         | 37.18        | -0.10                       | -5.36       | 0.49  |
|                      |                          | Validation Set  | 0.90 | 0.56 | 0.71                         | 37.43        | -0.10                       | -5.38       | 0.49  |
|                      |                          | Full Set        | 0.90 | 0.56 | 0.71                         | 37.31        | -0.10                       | -5.37       | 0.49  |
| Aljustrel            | No Bias Correction       |                 | 1.43 | 0.73 | 1.15                         | 60.06        | 0.98                        | 51.43       | -0.62 |
|                      | Regional Bias Correction |                 | 0.99 | 0.73 | 0.52                         | 27.28        | 0.00                        | -0.08       | 0.67  |
|                      | Local Bias Correction    | Calibration Set | 0.88 | 0.73 | 0.53                         | 27.53        | -0.22                       | -11.49      | 0.65  |
|                      |                          | Validation Set  | 0.87 | 0.73 | 0.54                         | 28.13        | -0.24                       | -12.36      | 0.65  |
|                      |                          | Full Set        | 0.87 | 0.73 | 0.53                         | 27.86        | -0.23                       | -11.91      | 0.65  |
| Alvalade             | No Bias Correction       |                 | 1.34 | 0.71 | 1.03                         | 49.90        | 0.83                        | 40.09       | -0.24 |
|                      | Regional Bias Correction |                 | 0.92 | 0.71 | 0.57                         | 27.54        | -0.16                       | -7.59       | 0.62  |
|                      | Local Bias Correction    | Calibration Set | 0.91 | 0.71 | 0.53                         | 25.92        | -0.16                       | -7.61       | 0.66  |
|                      |                          | Validation Set  | 0.90 | 0.70 | 0.55                         | 26.78        | -0.17                       | -8.08       | 0.65  |
|                      |                          | Full Set        | 0.91 | 0.71 | 0.54                         | 26.35        | -0.16                       | -7.85       | 0.65  |
| Beja                 | No Bias Correction       |                 | 1.29 | 0.79 | 0.79                         | 39.01        | 0.61                        | 29.72       | -0.11 |
|                      | Regional Bias Correction |                 | 0.86 | 0.79 | 0.55                         | 27.22        | -0.35                       | -17.13      | 0.46  |
|                      | Local Bias Correction    | Calibration Set | 0.91 | 0.78 | 0.40                         | 19.70        | -0.17                       | -8.28       | 0.72  |
|                      |                          | Validation Set  | 0.91 | 0.80 | 0.40                         | 19.48        | -0.18                       | -8.89       | 0.72  |
|                      |                          | Full Set        | 0.91 | 0.79 | 0.40                         | 19.59        | -0.17                       | -8.58       | 0.72  |
| Castro Verde         | No Bias Correction       |                 | 1.04 | 0.75 | 0.62                         | 23.08        | 0.19                        | 7.00        | 0.71  |
|                      | Regional Bias Correction |                 | 0.71 | 0.75 | 0.98                         | 36.35        | -0.79                       | -29.42      | 0.27  |
|                      | Local Bias Correction    | Calibration Set | 0.98 | 0.75 | 0.60                         | 22.08        | 0.00                        | 0.13        | 0.73  |
|                      |                          | Validation Set  | 0.99 | 0.75 | 0.60                         | 22.33        | 0.02                        | 0.73        | 0.73  |
|                      |                          | Full Set        | 0.98 | 0.75 | 0.60                         | 22.20        | 0.01                        | 0.42        | 0.73  |
| Elvas                | No Bias Correction       |                 | 1.30 | 0.54 | 1.03                         | 56.72        | 0.74                        | 40.53       | -0.36 |
|                      | Regional Bias Correction |                 | 0.86 | 0.54 | 0.69                         | 38.04        | -0.21                       | -11.34      | 0.39  |
|                      | Local Bias Correction    | Calibration Set | 0.90 | 0.55 | 0.65                         | 35.58        | -0.12                       | -6.77       | 0.47  |
|                      |                          | Validation Set  | 0.89 | 0.53 | 0.66                         | 36.21        | -0.13                       | -6.90       | 0.45  |
|                      |                          | Full Set        | 0.89 | 0.54 | 0.65                         | 35.90        | -0.12                       | -6.83       | 0.46  |
| Estremoz             | No Bias Correction       |                 | 1.53 | 0.52 | 1.33                         | 86.74        | 1.11                        | 72.66       | -1.49 |
|                      | Regional Bias Correction |                 | 1.03 | 0.52 | 0.68                         | 44.26        | 0.16                        | 10.29       | 0.35  |
|                      | Local Bias Correction    | Calibration Set | 0.72 | 0.70 | 0.57                         | 39.01        | -0.43                       | -29.58      | 0.24  |
|                      |                          | Validation Set  | 0.80 | 0.58 | 0.50                         | 40.50        | -0.20                       | -16.50      | 0.47  |
|                      |                          | Full Set        | 0.64 | 0.51 | 0.77                         | 50.46        | -0.50                       | -32.68      | 0.16  |
| Évora                | No Bias Correction       |                 | 1.17 | 0.62 | 0.92                         | 45.38        | 0.61                        | 29.73       | 0.30  |
|                      | Regional Bias Correction |                 | 0.79 | 0.62 | 0.76                         | 37.46        | -0.35                       | -17.12      | 0.52  |
|                      | Local Bias Correction    | Calibration Set | 0.97 | 0.62 | 0.73                         | 35.78        | 0.04                        | 2.05        | 0.57  |
|                      |                          | Validation Set  | 0.98 | 0.62 | 0.72                         | 35.40        | 0.06                        | 2.87        | 0.57  |
|                      |                          | Full Set        | 0.97 | 0.62 | 0.72                         | 35.33        | 0.04                        | 2.03        | 0.57  |
| Ferreira do Alentejo | No Bias Correction       |                 | 1.67 | 0.68 | 1.37                         | 87.02        | 1.22                        | 77.45       | -2.34 |
|                      | Regional Bias Correction |                 | 1.14 | 0.68 | 0.59                         | 37.50        | 0.24                        | 15.59       | 0.38  |
|                      | Calibration Set          |                 | 0.78 | 0.68 | 0.57                         | 36.07        | -0.36                       | -22.60      | 0.42  |

|                      |                          |                 |      |      |      |        |       |        |       |
|----------------------|--------------------------|-----------------|------|------|------|--------|-------|--------|-------|
|                      | Local Bias<br>Correction | Validation Set  | 0.78 | 0.67 | 0.57 | 36.44  | -0.35 | -22.64 | 0.42  |
|                      |                          | Full Set        | 0.78 | 0.67 | 0.57 | 36.26  | -0.36 | -22.62 | 0.42  |
| Moura                | No Bias Correction       |                 | 1.79 | 0.67 | 1.39 | 105.62 | 1.24  | 94.54  | -3.03 |
|                      | Regional Bias Correction |                 | 1.20 | 0.67 | 0.61 | 46.28  | 0.30  | 22.75  | 0.23  |
|                      | Local Bias<br>Correction | Calibration Set | 0.73 | 0.60 | 0.56 | 43.05  | -0.34 | -26.27 | 0.33  |
|                      |                          | Validation Set  | 0.73 | 0.61 | 0.57 | 43.09  | -0.35 | -26.53 | 0.33  |
|                      |                          | Full Set        | 0.73 | 0.61 | 0.57 | 43.09  | -0.35 | -26.44 | 0.33  |
| Odemira              | No Bias Correction       |                 | 1.63 | 0.67 | 1.63 | 80.31  | 1.44  | 70.66  | -2.32 |
|                      | Regional Bias Correction |                 | 1.17 | 0.67 | 0.77 | 37.83  | 0.38  | 18.87  | 0.26  |
|                      | Local Bias<br>Correction | Calibration Set | 0.78 | 0.67 | 0.71 | 35.26  | -0.47 | -23.13 | 0.36  |
|                      |                          | Validation Set  | 0.77 | 0.68 | 0.72 | 35.05  | -0.48 | -23.71 | 0.37  |
|                      |                          | Full Set        | 0.77 | 0.67 | 0.71 | 35.16  | -0.48 | -23.42 | 0.36  |
| Redondo              | No Bias Correction       |                 | 0.96 | 0.66 | 0.77 | 30.19  | 0.12  | 4.54   | 0.65  |
|                      | Regional Bias Correction |                 | 0.65 | 0.66 | 1.14 | 44.94  | -0.84 | -33.15 | 0.23  |
|                      | Local Bias<br>Correction | Calibration Set | 0.97 | 0.67 | 0.78 | 30.85  | 0.02  | 0.97   | 0.63  |
|                      |                          | Validation Set  | 0.97 | 0.66 | 0.80 | 31.61  | 0.06  | 2.26   | 0.63  |
|                      |                          | Full Set        | 0.97 | 0.66 | 0.79 | 31.24  | 0.04  | 1.62   | 0.63  |
| Serpa                | No Bias Correction       |                 | 1.73 | 0.64 | 1.43 | 101.75 | 1.26  | 90.29  | -2.49 |
|                      | Regional Bias Correction |                 | 1.17 | 0.64 | 0.65 | 46.37  | 0.31  | 21.97  | 0.28  |
|                      | Local Bias<br>Correction | Calibration Set | 0.78 | 0.67 | 0.57 | 36.71  | -0.34 | -21.99 | 0.44  |
|                      |                          | Validation Set  | 0.89 | 0.63 | 0.48 | 38.23  | -0.09 | -7.08  | 0.57  |
|                      |                          | Full Set        | 0.83 | 0.63 | 0.53 | 37.53  | -0.21 | -15.31 | 0.53  |
| Viana do<br>Alentejo | No Bias Correction       |                 | 1.24 | 0.76 | 0.78 | 35.39  | 0.58  | 26.02  | 0.18  |
|                      | Regional Bias Correction |                 | 0.84 | 0.76 | 0.61 | 27.55  | -0.40 | -17.92 | 0.50  |
|                      | Local Bias<br>Correction | Calibration Set | 0.94 | 0.76 | 0.45 | 20.08  | -0.11 | -5.09  | 0.72  |
|                      |                          | Validation Set  | 0.95 | 0.77 | 0.44 | 20.22  | -0.10 | -4.51  | 0.74  |
|                      |                          | Full Set        | 0.94 | 0.76 | 0.45 | 20.15  | -0.11 | -4.80  | 0.73  |
| Vidigueira           | No Bias Correction       |                 | 1.52 | 0.66 | 1.20 | 73.86  | 1.03  | 63.38  | -1.17 |
|                      | Regional Bias Correction |                 | 1.02 | 0.66 | 0.55 | 33.76  | 0.07  | 4.38   | 0.55  |
|                      | Local Bias<br>Correction | Calibration Set | 0.85 | 0.67 | 0.55 | 33.90  | -0.23 | -14.57 | 0.56  |
|                      |                          | Validation Set  | 0.84 | 0.65 | 0.56 | 34.20  | -0.25 | -15.51 | 0.52  |
|                      |                          | Full Set        | 0.84 | 0.66 | 0.55 | 34.06  | -0.24 | -15.05 | 0.54  |

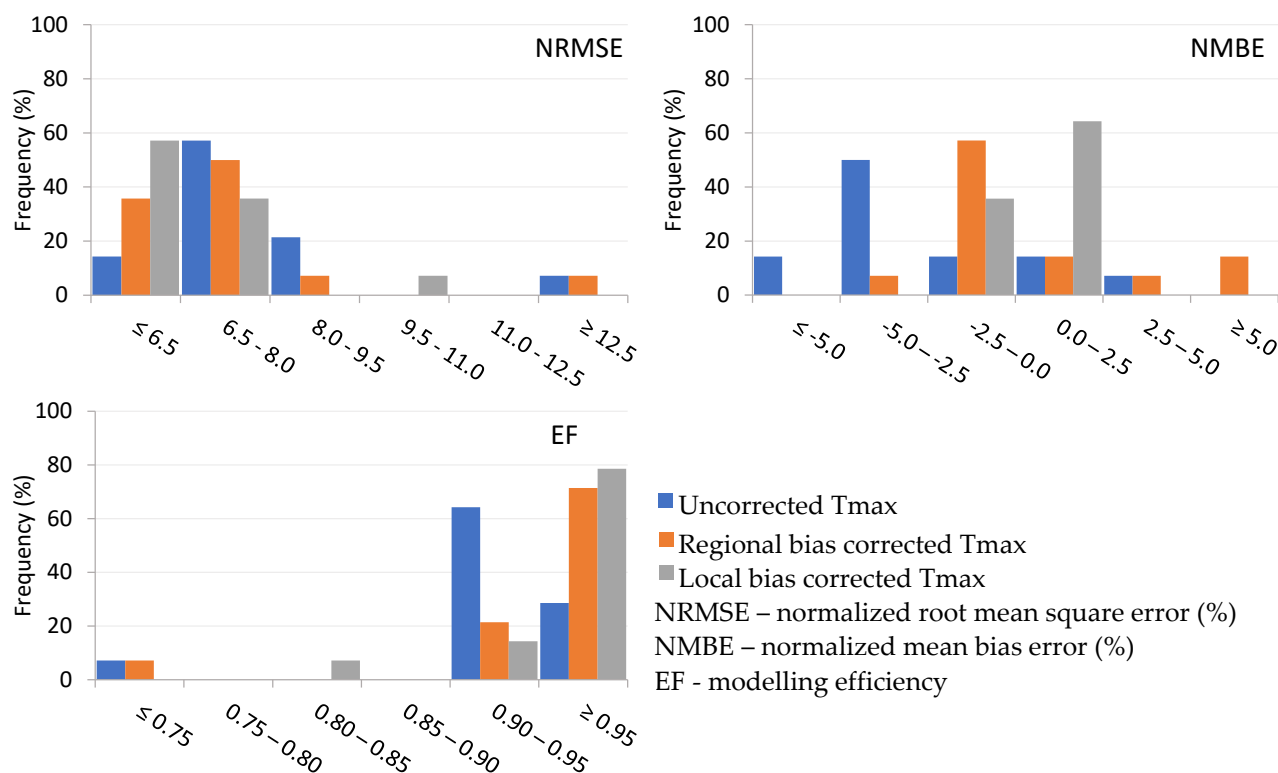

Figure S1. Frequency (%) distribution of the accuracy metrics measuring the performance of NASA POWER maximum temperature (Tmax) without bias correction compared with adopting a regional bias correction and a local bias correction.

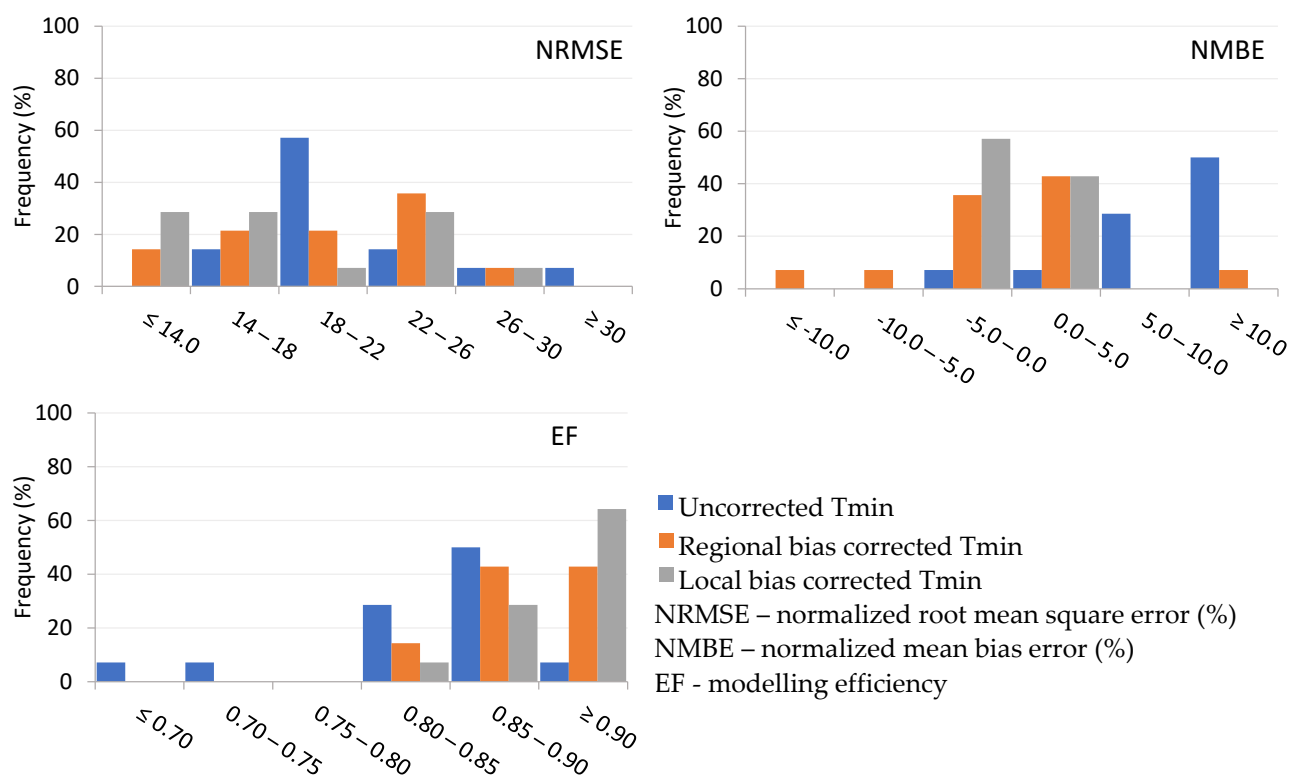

Figure S2. Frequency (%) distribution of the accuracy metrics measuring the performance of NASA POWER minimum temperature (Tmin) without bias correction compared with adopting a regional bias correction and a local bias correction.

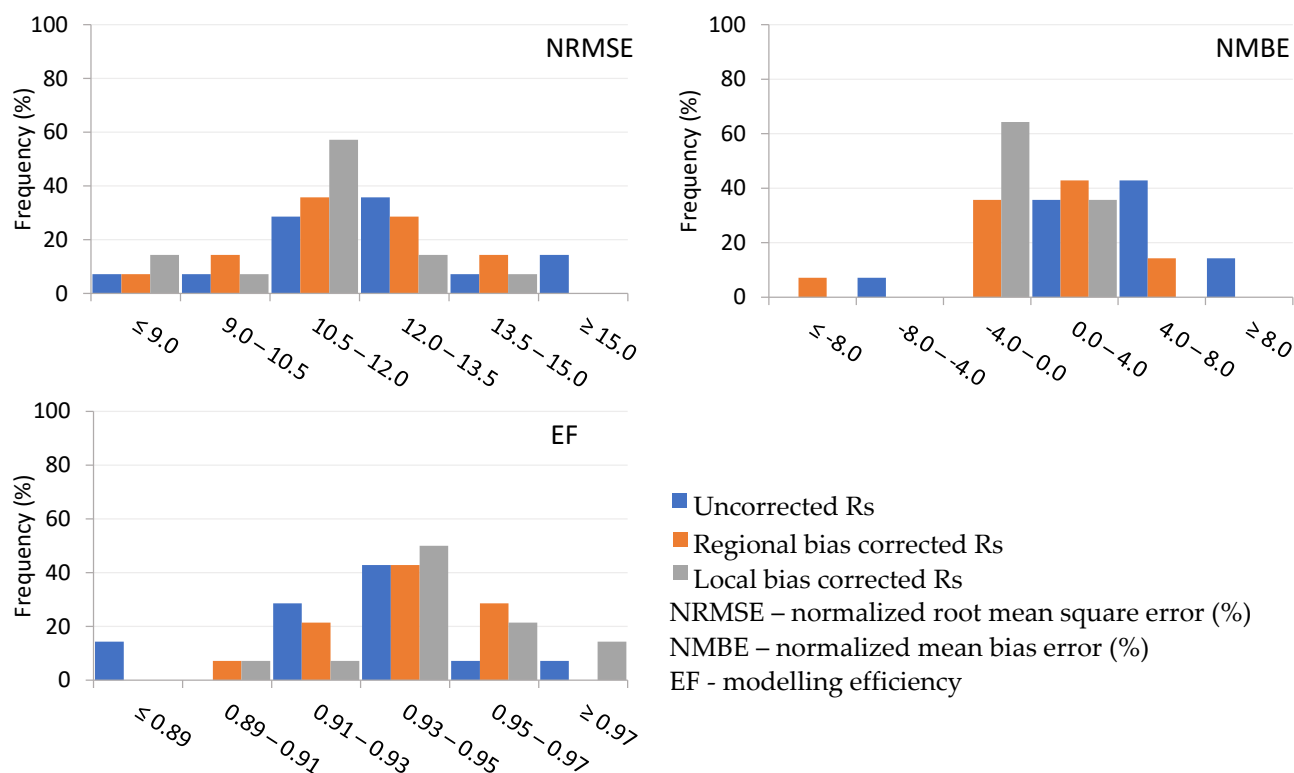

Figure S3. Frequency (%) distribution of the accuracy metrics measuring the performance of NASA POWER solar radiation (Rs) without bias correction compared with adopting a regional bias correction and a local bias correction.

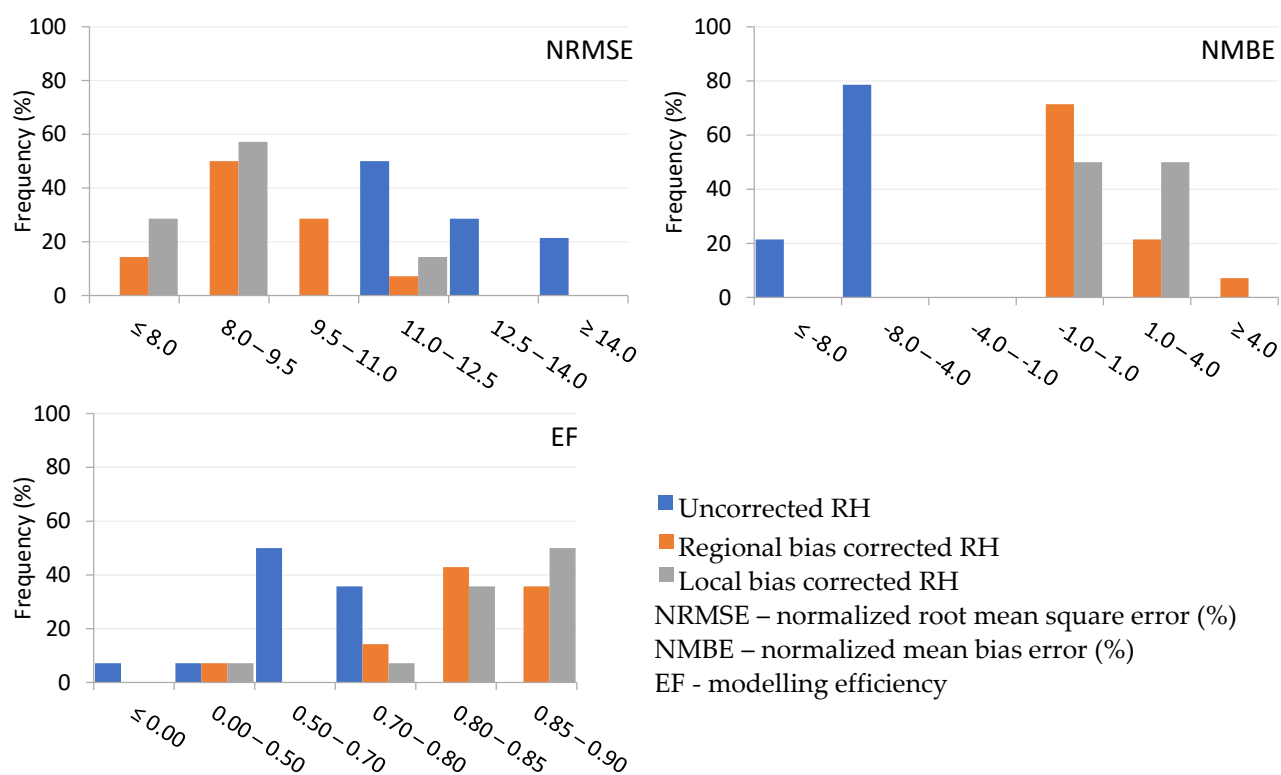

Figure S4. Frequency (%) distribution of the accuracy metrics measuring the performance of NASA POWER relative humidity (RH) without bias correction compared with adopting a regional bias correction and a local bias correction.

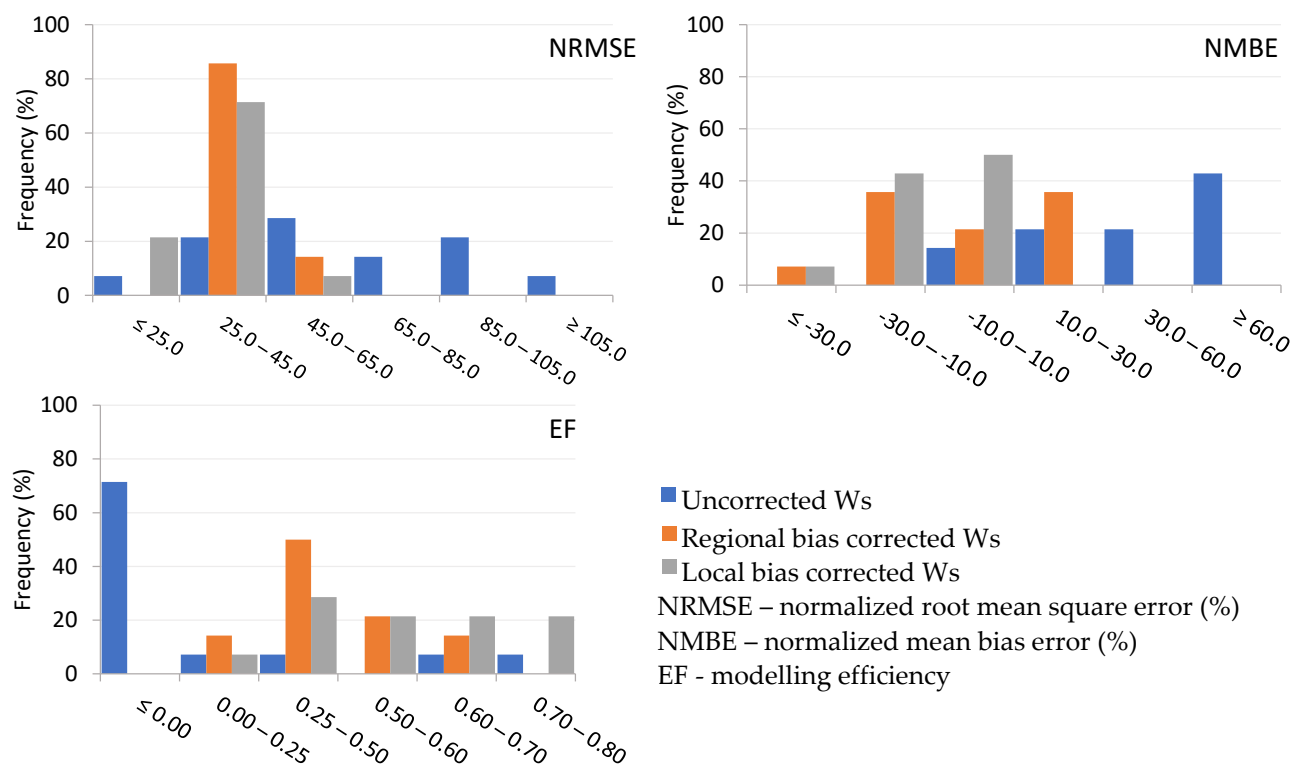

Figure S5. Frequency (%) distribution of the accuracy metrics measuring the performance of NASA POWER wind speed (Ws) without bias correction compared with adopting a regional bias correction and a local bias correction.
